# Supplementary material
Source: HighWire-hosted journal article supplement (https://jech.bmj.com/content/jech-2017-209999)

# Health domain deprivation, 2015

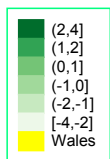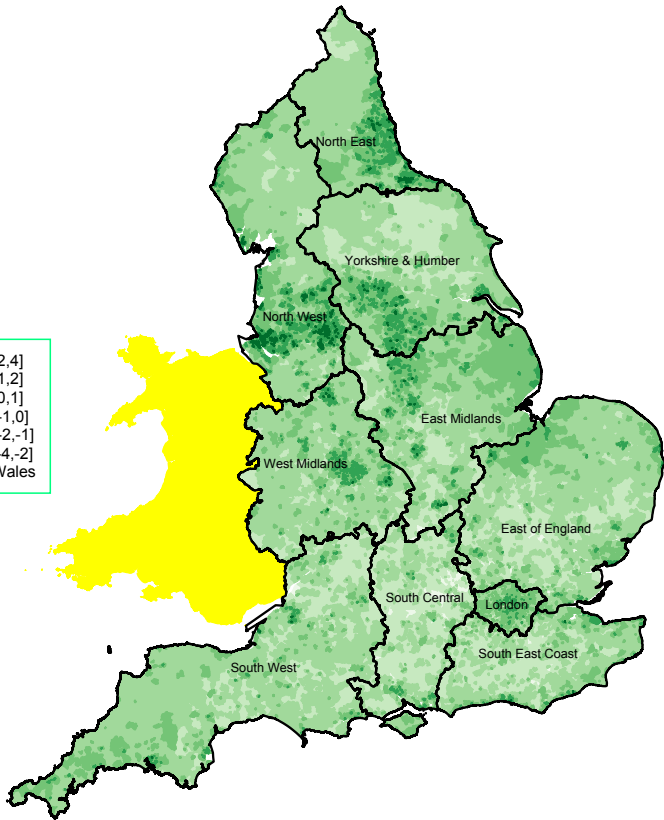

# North East, health domain deprivation

2004

2007

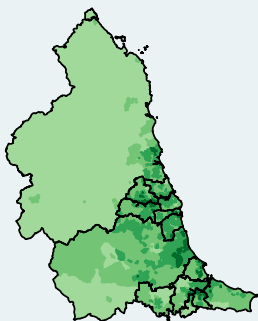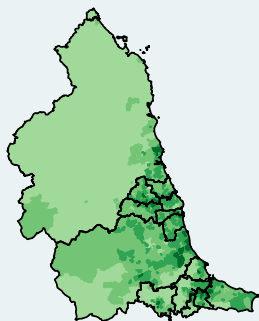

2010

2015

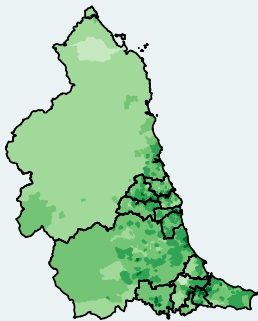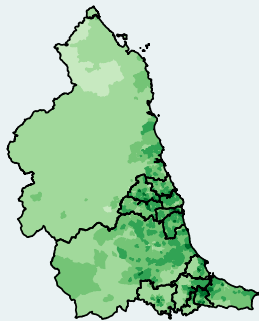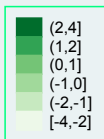

# North West, health domain deprivation

2004

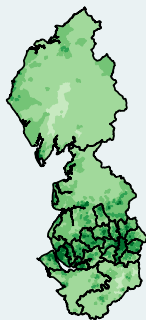

2007

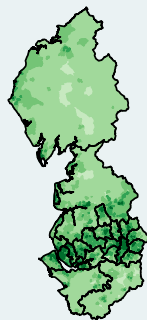

2010

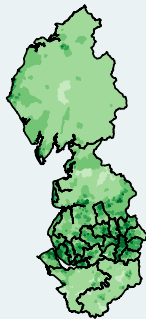

2015

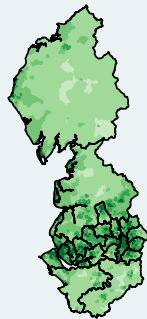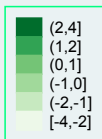

# Yorkshire and the Humber, health domain deprivation

2004

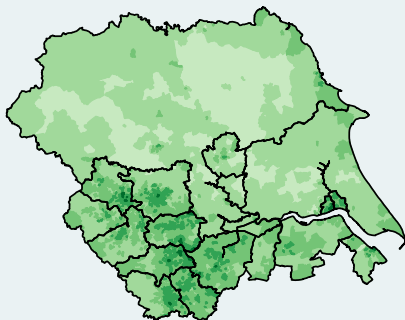

2007

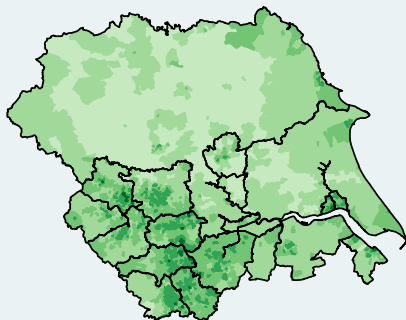

2010

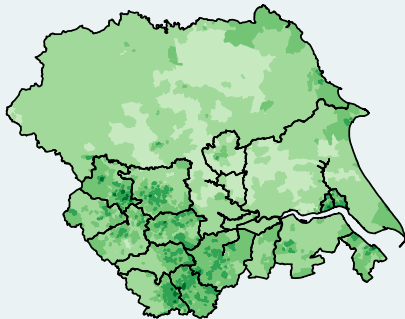

2015

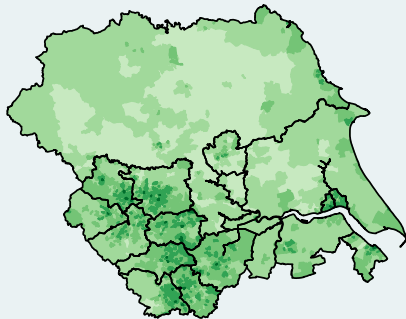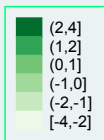



# East Midlands, health domain deprivation

2004

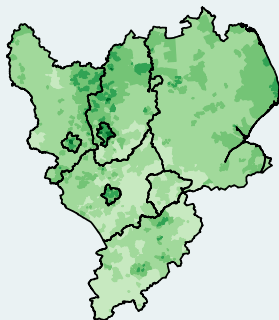

2007

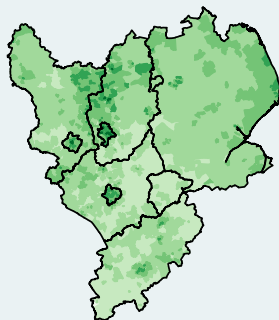

2010

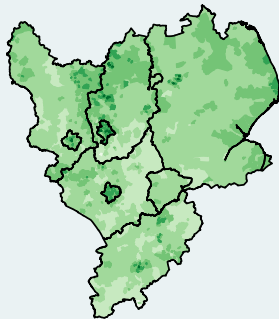

2015

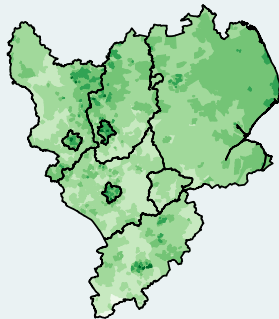

# West Midlands, health domain deprivation

2004

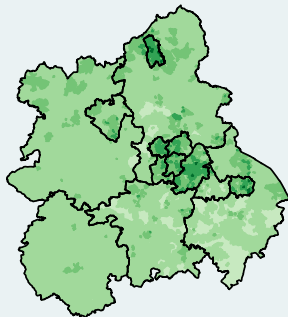

2007

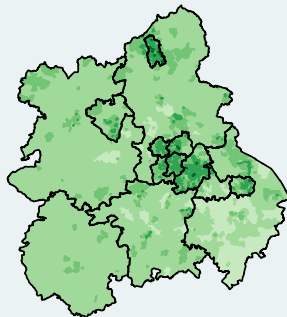

2010

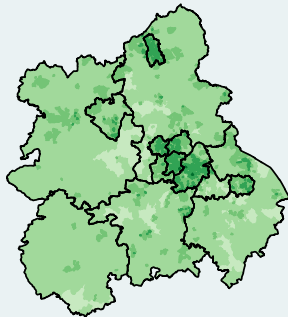

2015

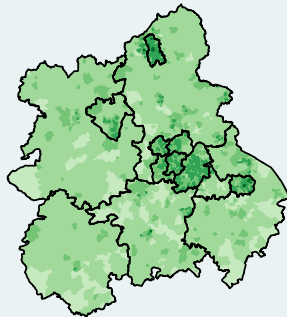

# East of England, health domain deprivation

2004

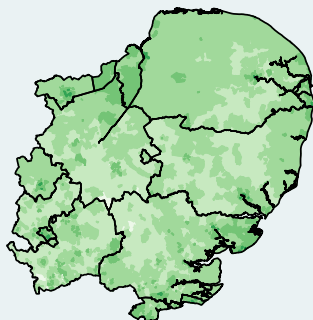

2007

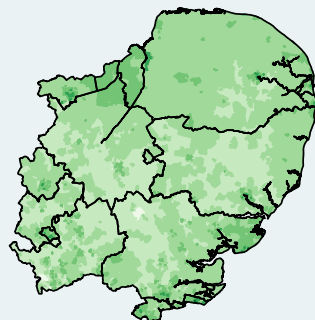

2010

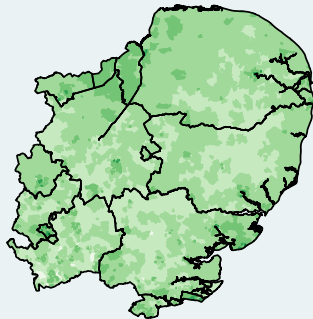

2015

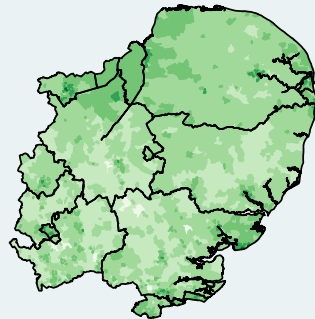

# London, health domain deprivation

2004

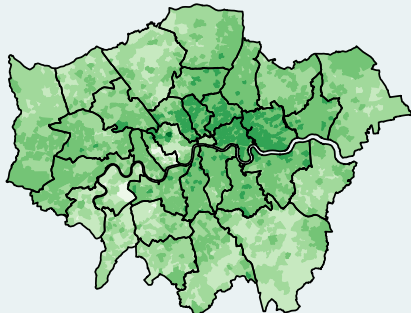

2007

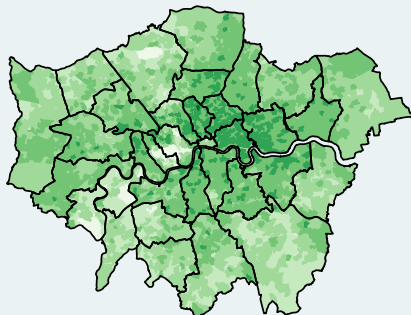

2010

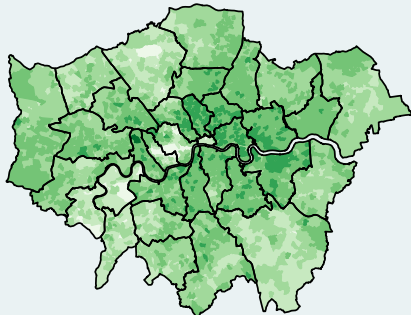

2015

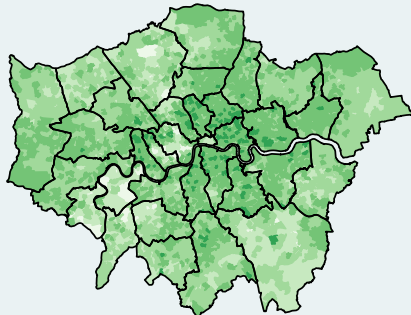

# South East Coast, health domain deprivation

2004

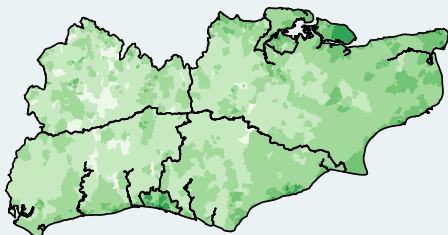

2007

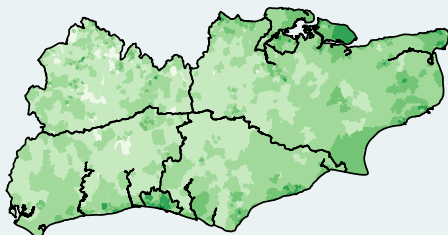

2010

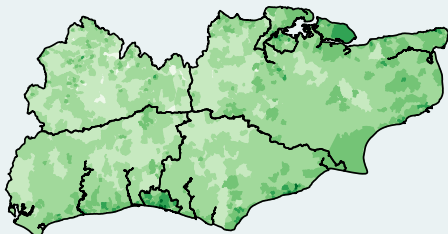

2015

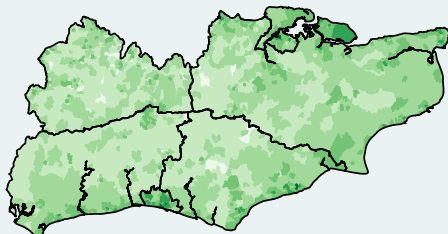

# South Central, health domain deprivation

2004

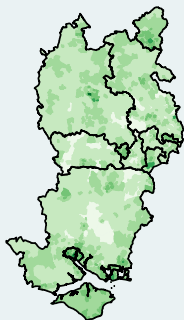

2007

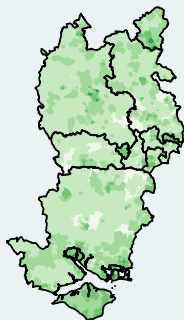

2010

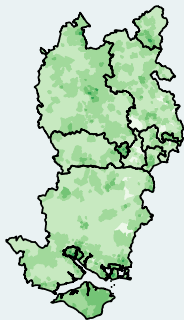

2015

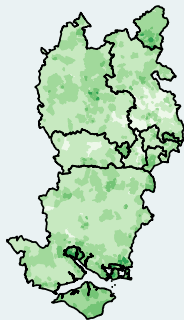

# South West, health domain deprivation

2004

2007

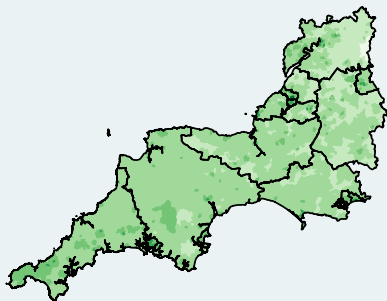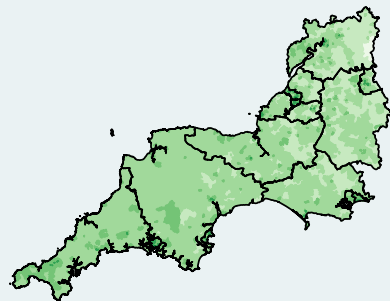

2010

2015

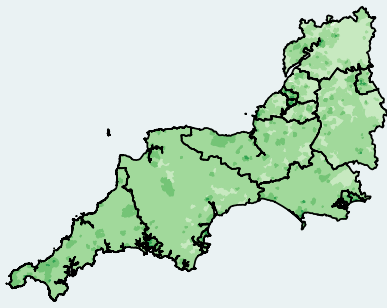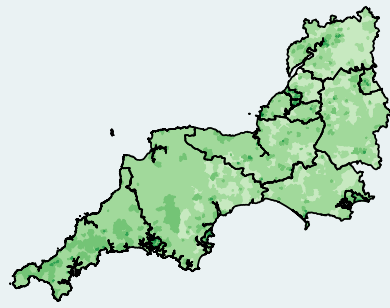

Supplement: inline-supplementary-material-3 [file inline-supplementary-material-3.pdf]
