# Supplementary material
Source: HighWire-hosted journal article supplement (https://jech.bmj.com/content/jech-2017-209999)

# England 2015, years of potential life lost

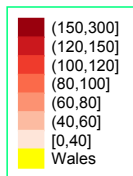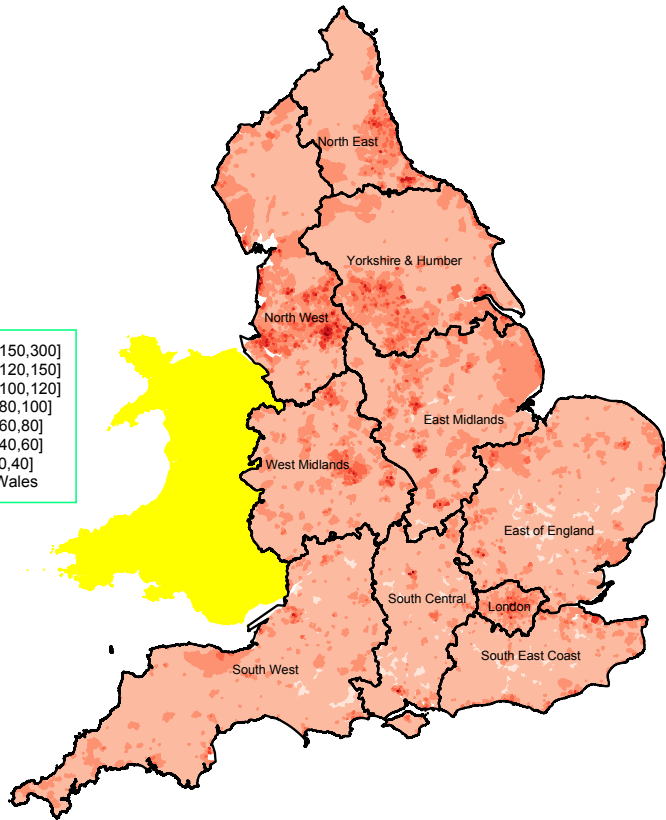

# Birmingham, years of potential life lost

2004

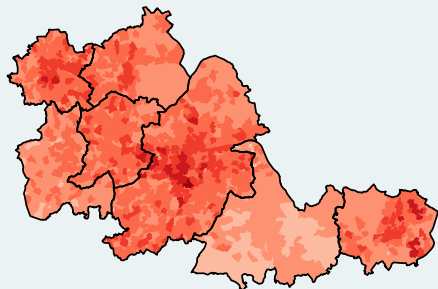

2007

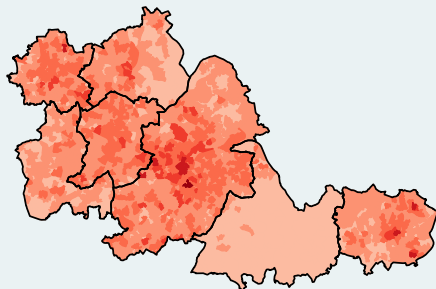

2010

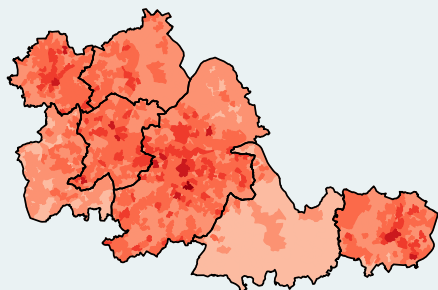

2015

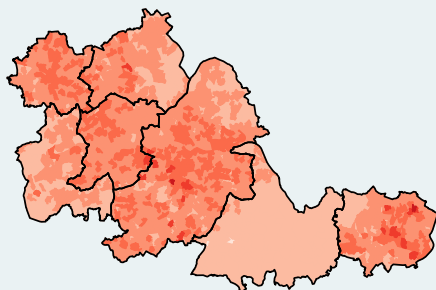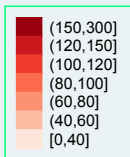



# London, years of potential life lost

2004

2007

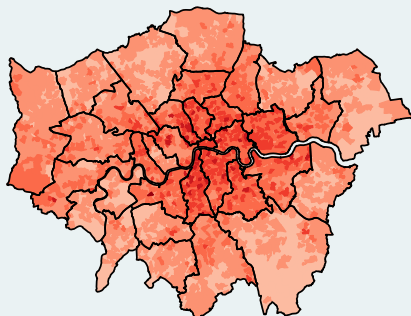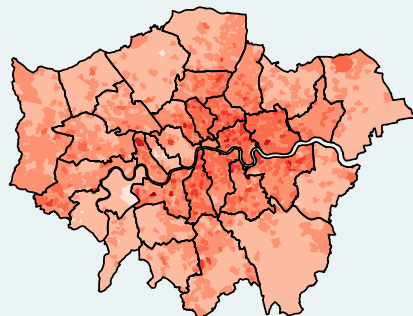

2010

2015

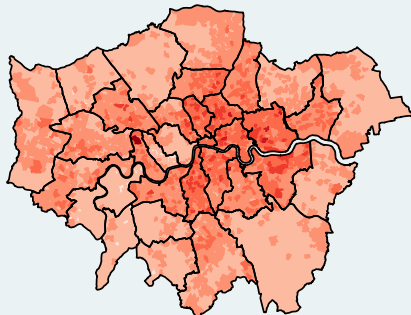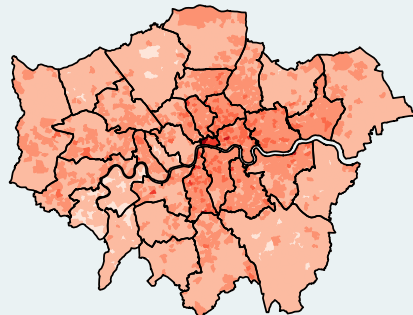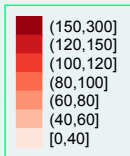

# Manchester, years of potential life lost

2004

2007

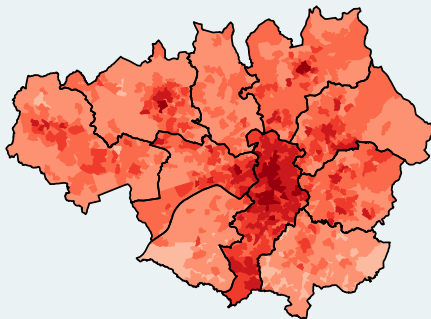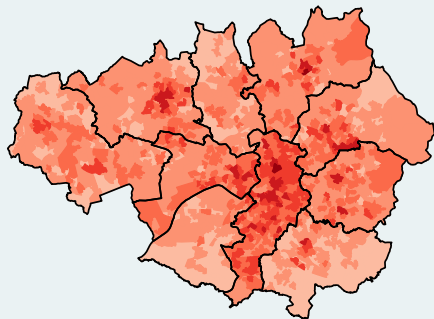

2010

2015

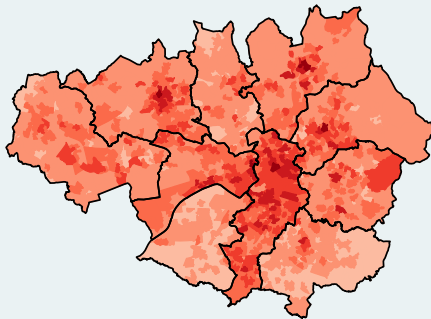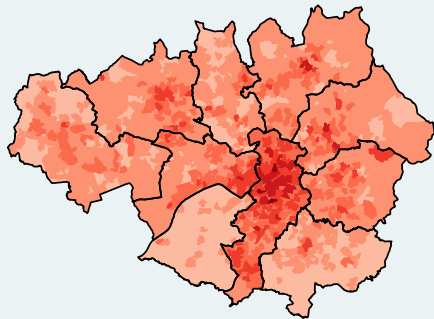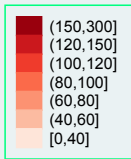

# East Midlands, years of potential life lost

2004

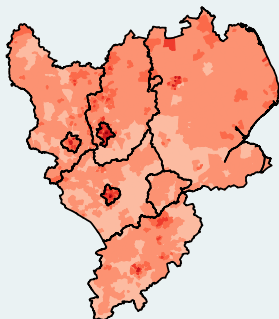

2007

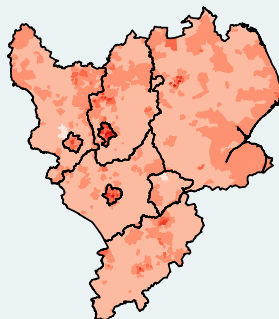

2010

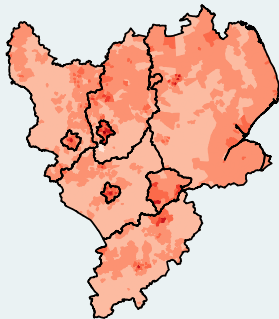

2015

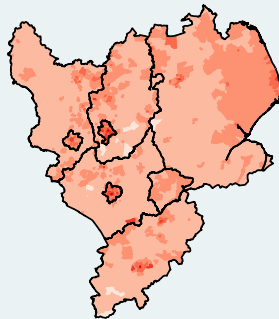

# East of England, years of potential life lost

2004

2007

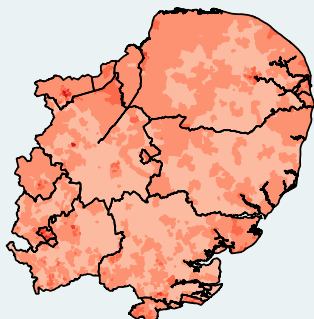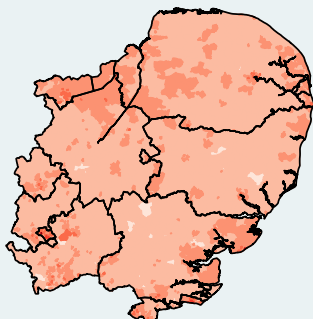

2010

2015

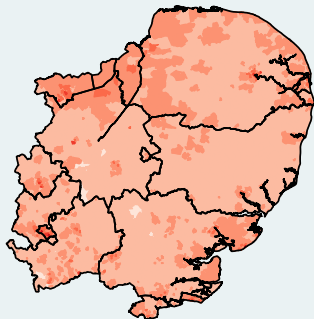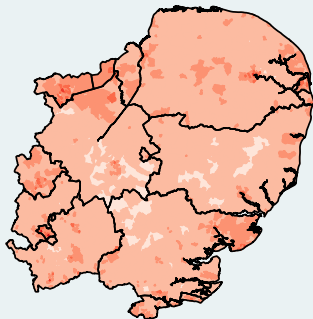

# North East, years of potential life lost

2004

2007

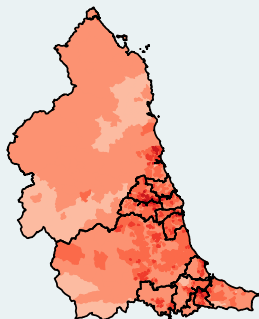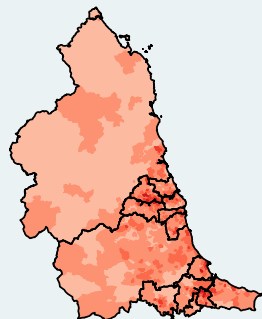

2010

2015

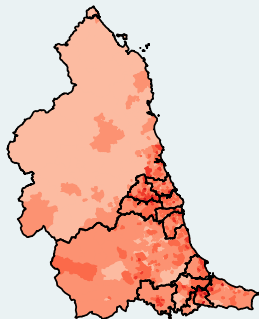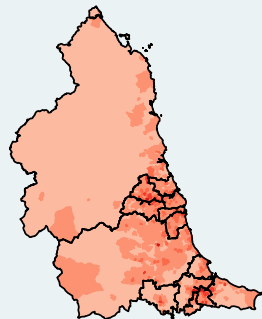

# North West, years of potential life lost

2004

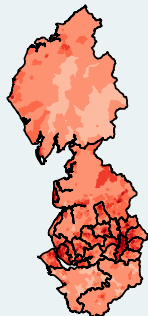

2007

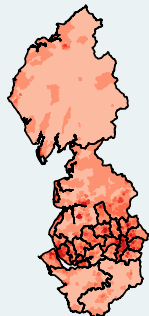

2010

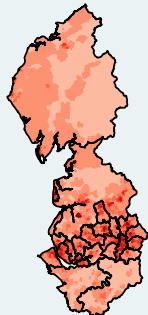

2015

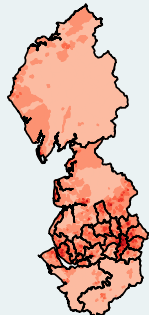

# South Central, years of potential life lost

2004

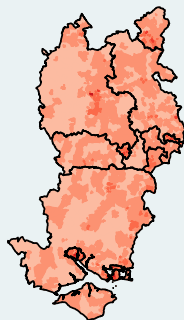

2007

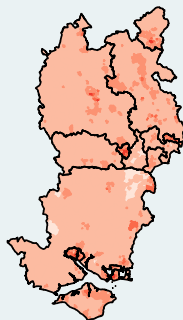

2010

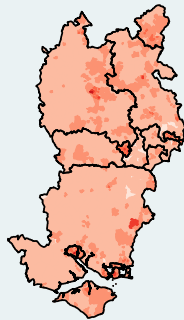

2015

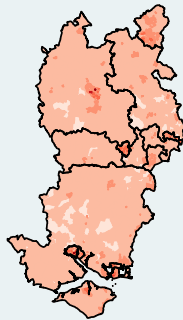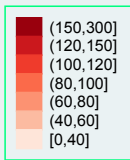

# South East Coast, years of potential life lost

2004

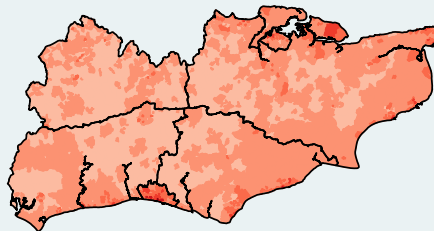

2007

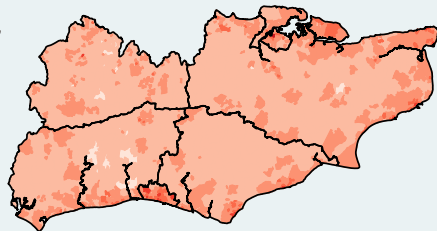

2010

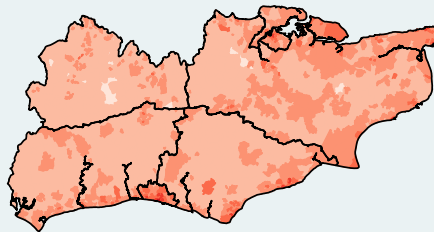

2015

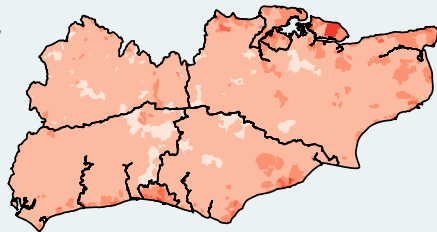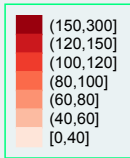



# South West, years of potential life lost

2004

2007

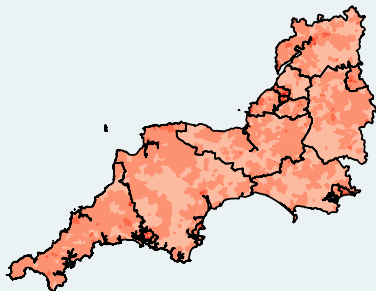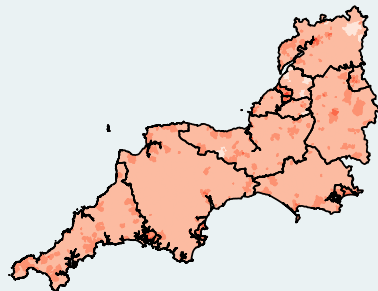

2010

2015

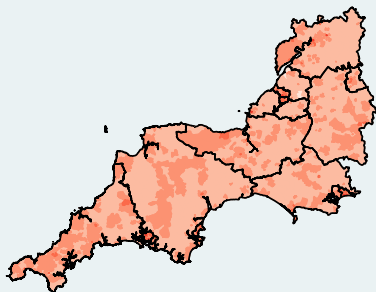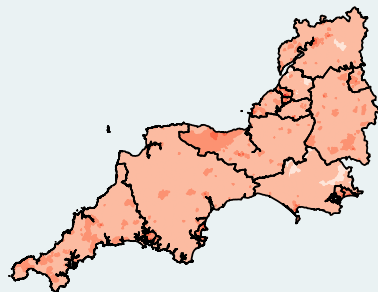

# West Midlands, years of potential life lost

2004

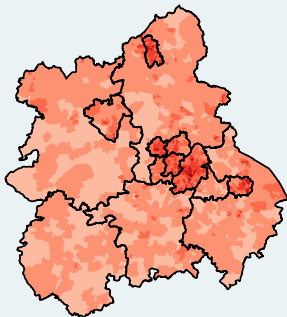

2007

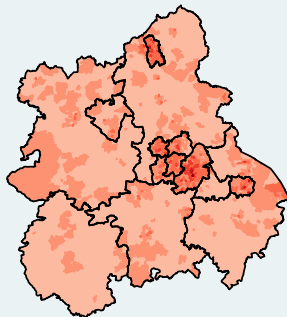

2010

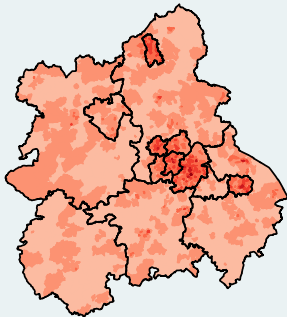

2015

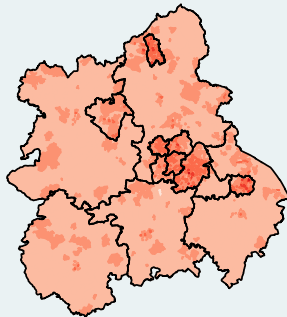

# Yorkshire and the Humber, years of potential life lost

2004

2007

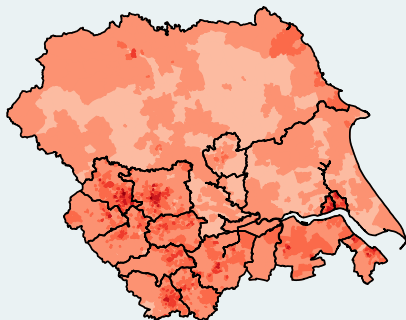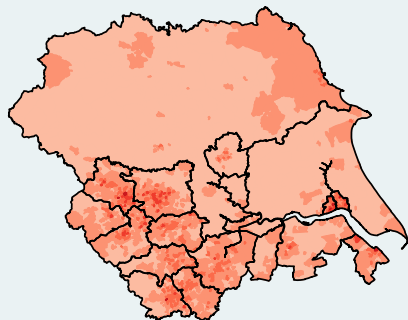

2010

2015

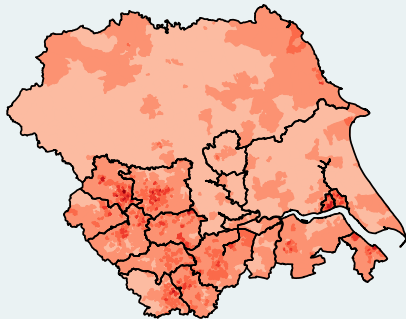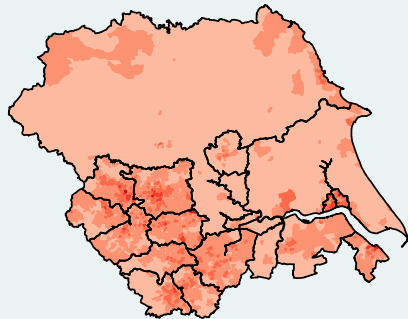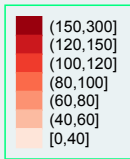

Supplement: inline-supplementary-material-4 [file inline-supplementary-material-4.pdf]
