# Supplementary material
Source: HighWire-hosted journal article supplement (https://jech.bmj.com/content/jech-2017-209999)

# Overall deprivation, 2015

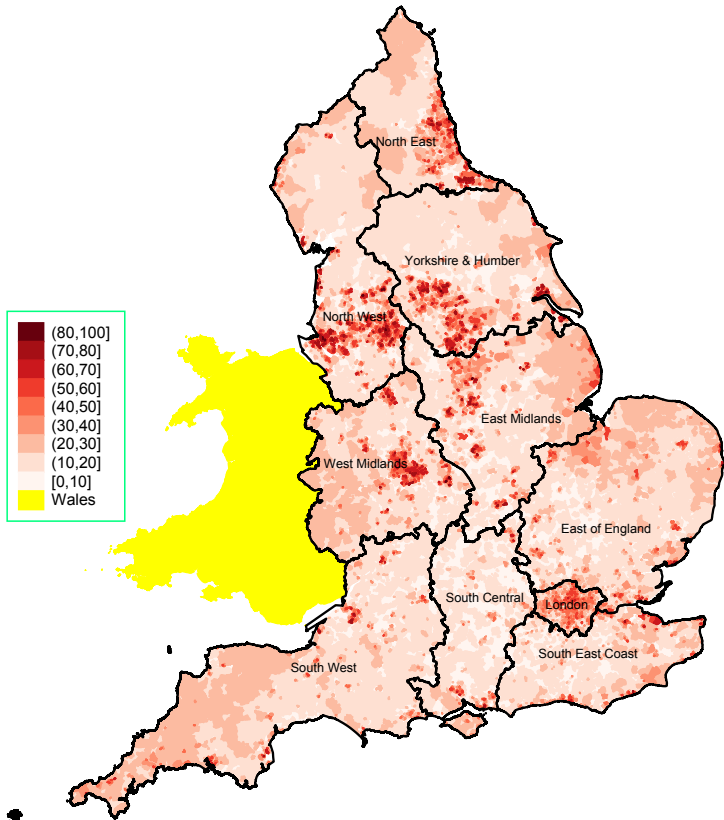

# North East, overall deprivation

2004

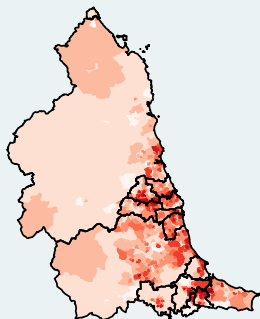

2007

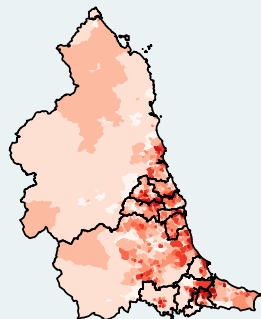

2010

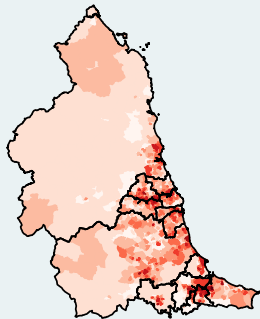

2015

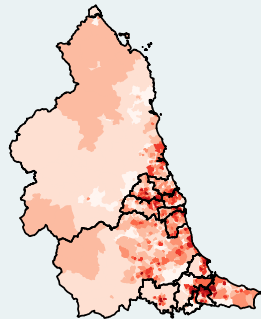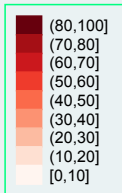

# North West, overall deprivation

2004

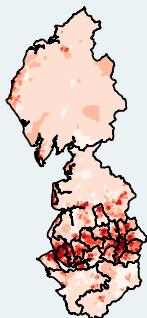

2007

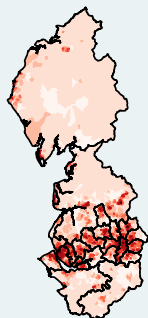

2010

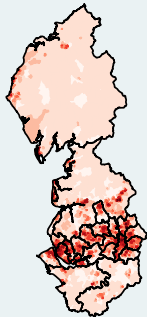

2015

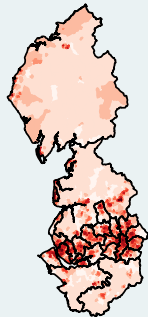

# Yorkshire and the Humber, overall deprivation

2004

2007

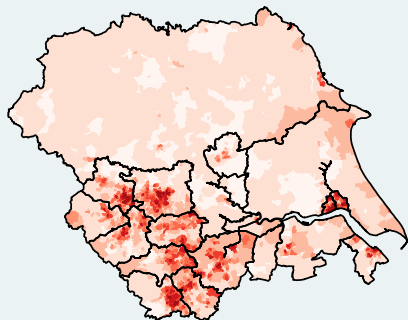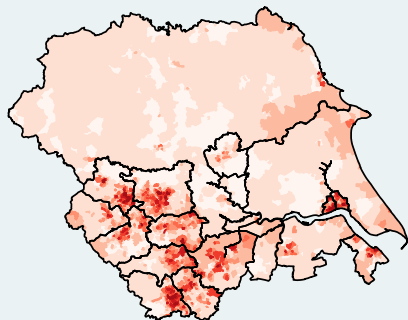

2010

2015

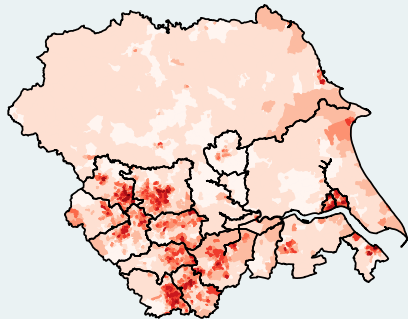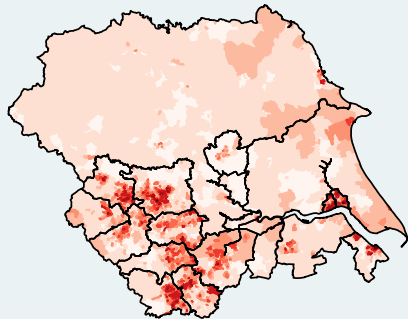



# East Midlands, overall deprivation

2004

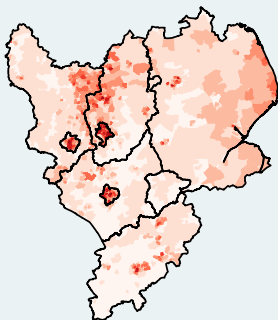

2007

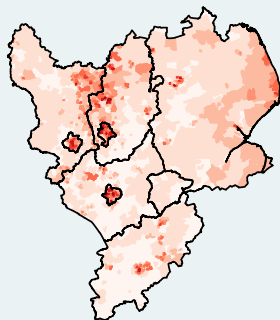

2010

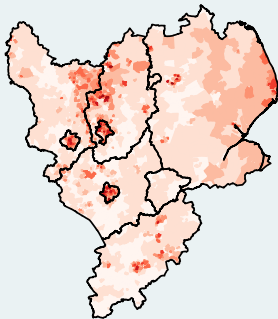

2015

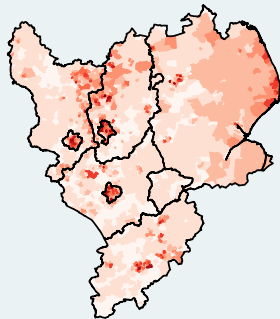

# West Midlands, overall deprivation

2004

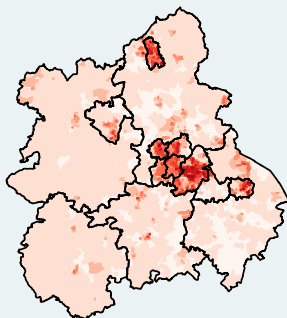

2007

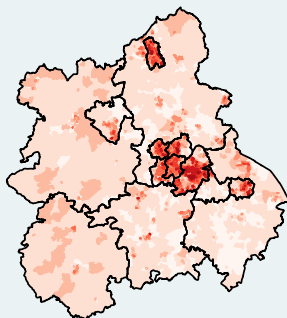

2010

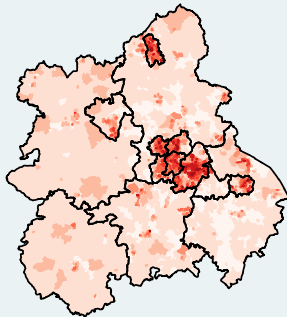

2015

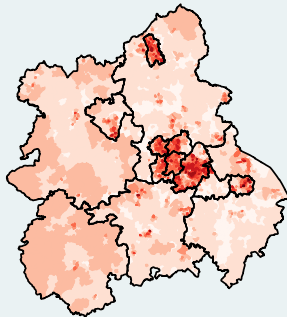

# East of England, overall deprivation

2004

2007

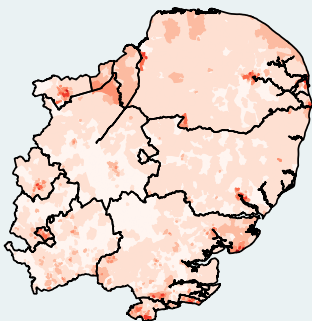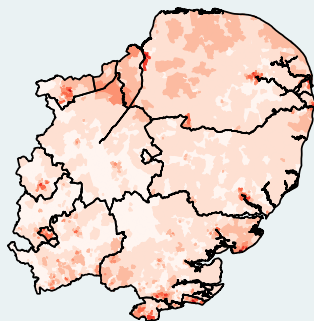

2010

2015

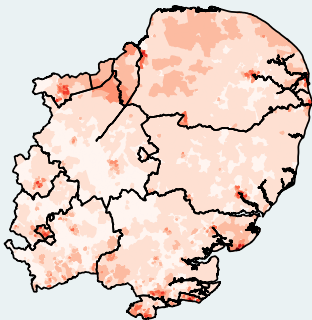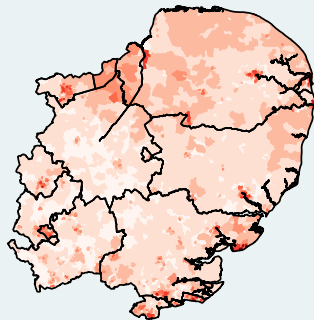

# London, overall deprivation

2004

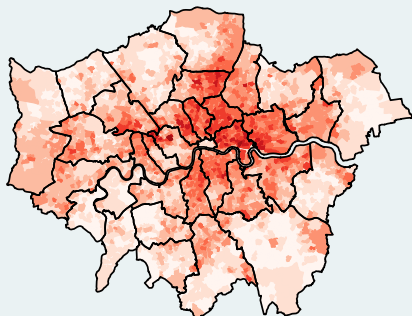

2007

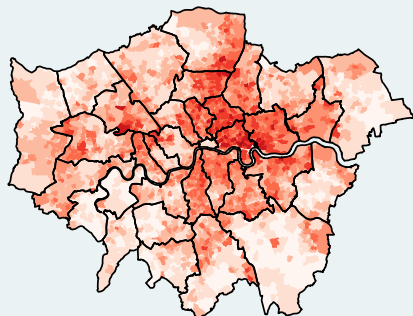

2010

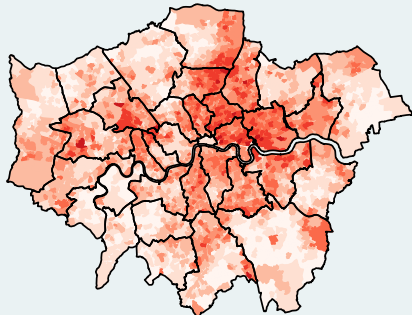

2015

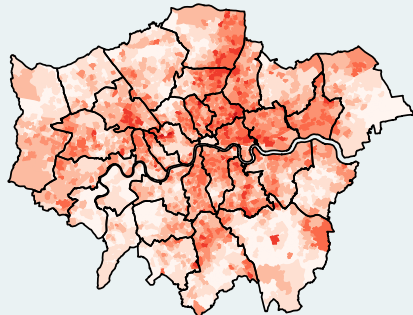

# South East Coast, overall deprivation

2004

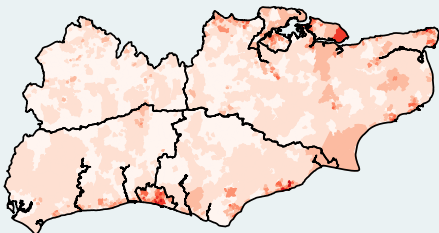

2007

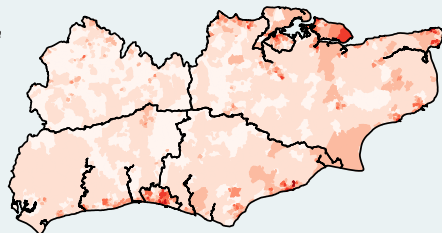

2010

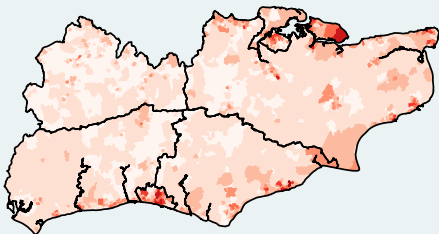

2015

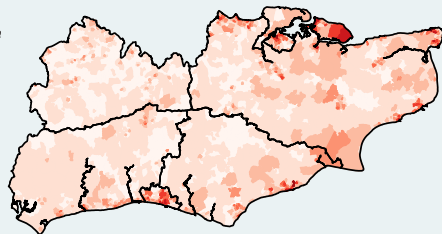

# South Central, overall deprivation

2004

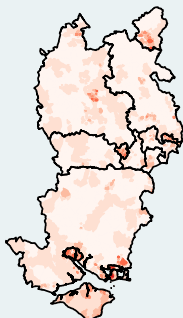

2007

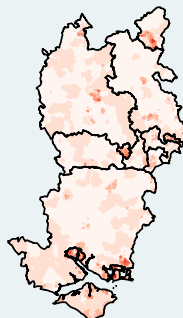

2010

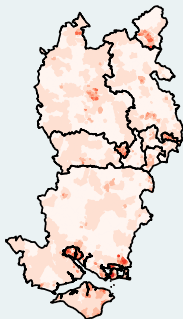

2015

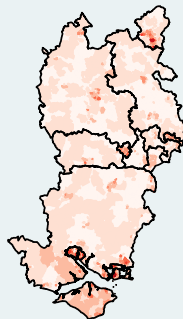

# South West, overall deprivation

2004

2007

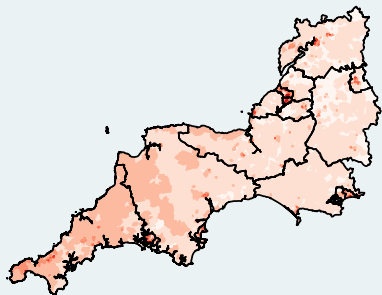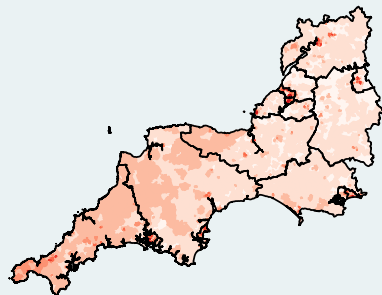

2010

2015

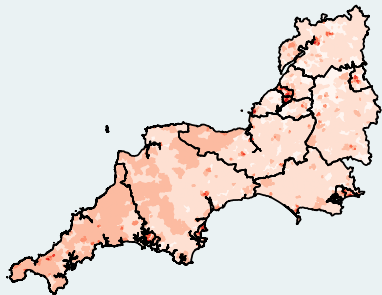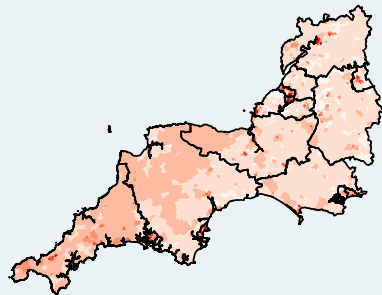

Supplement: inline-supplementary-material-5 [file inline-supplementary-material-5.pdf]
