# Supplementary material
Source: HighWire-hosted journal article supplement (https://jech.bmj.com/content/jech-2017-209999)

# England 2015, acute morbidity

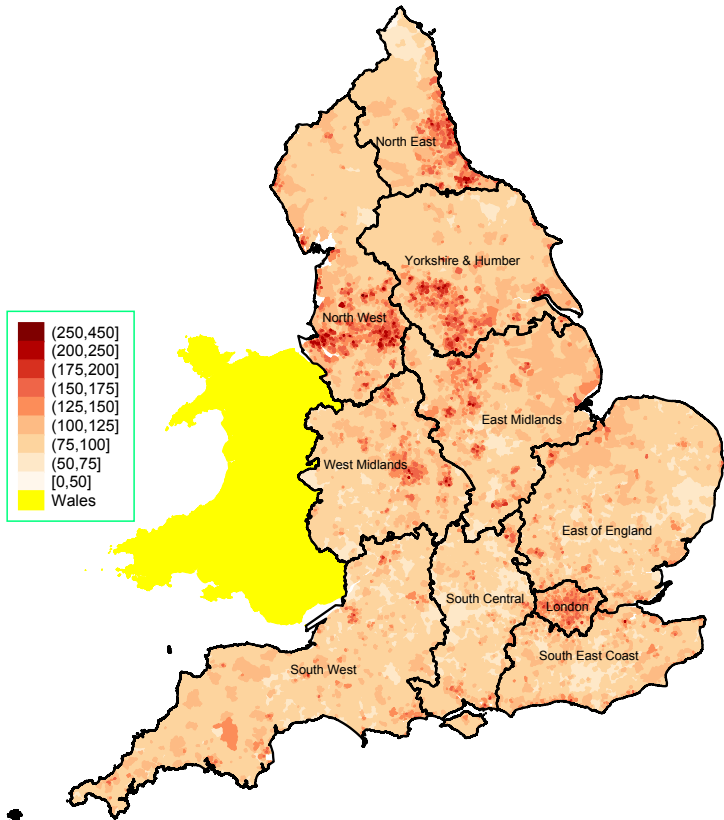

# Birmingham, acute morbidity

2004

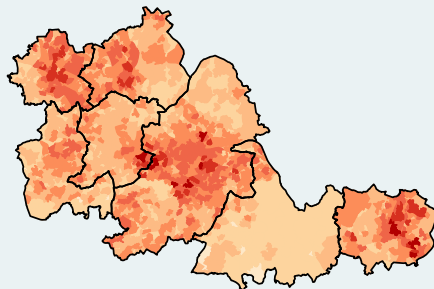

2007

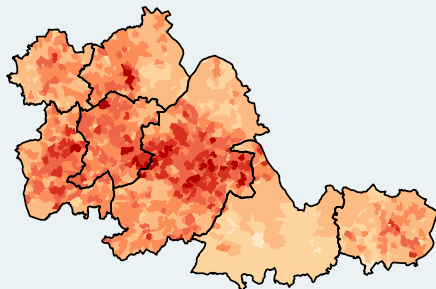

2010

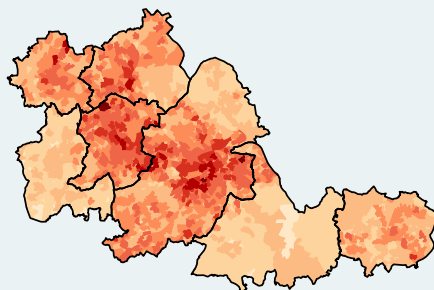

2015

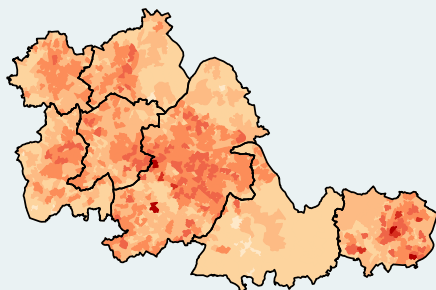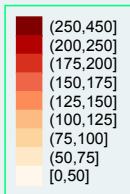

# London, acute morbidity

2004

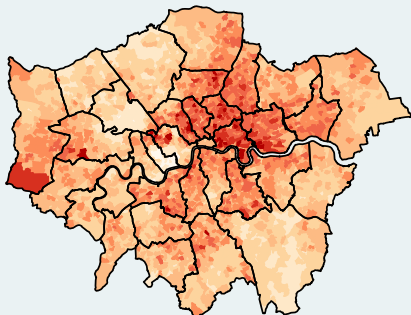

2007

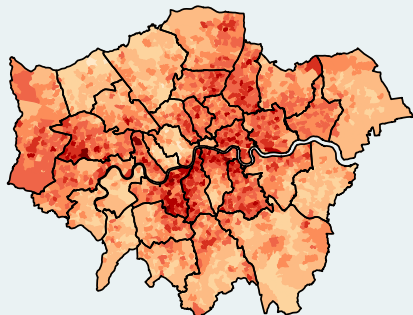

2010

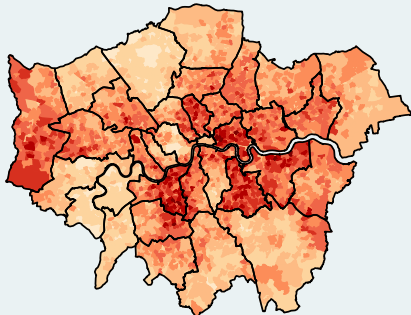

2015

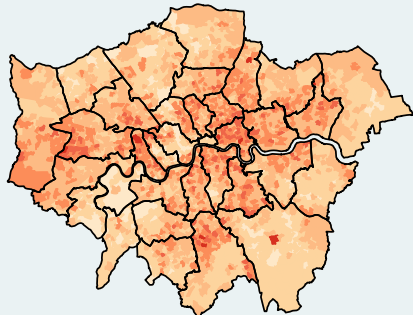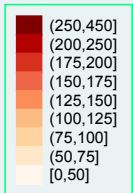

# Manchester, acute morbidity

2004

2007

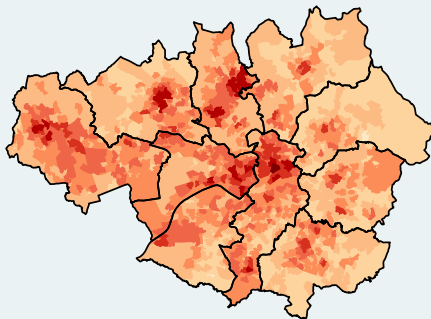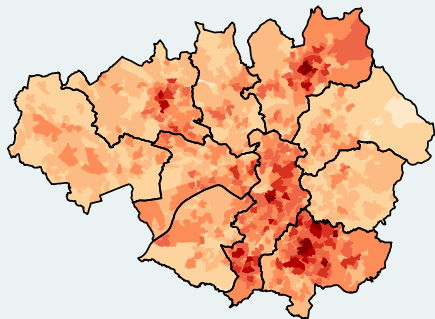

2010

2015

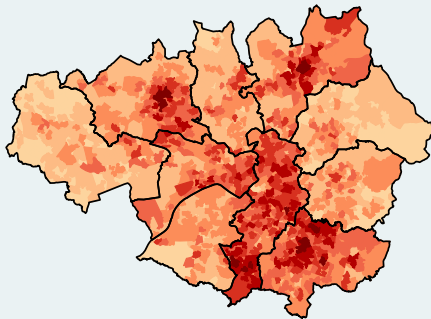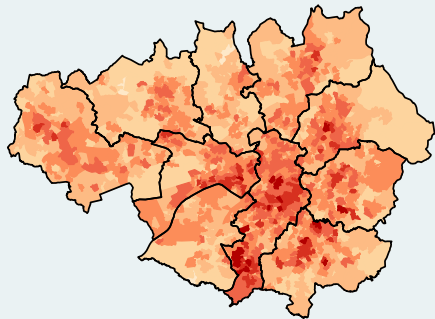

# East Midlands, acute morbidity

2004

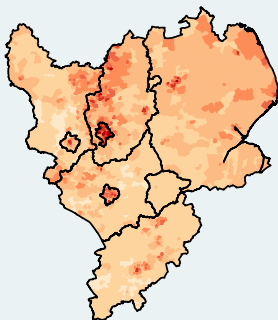

2007

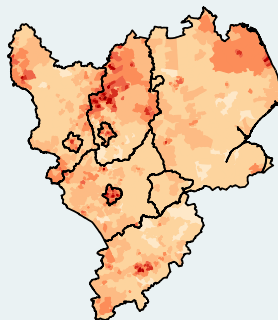

2010

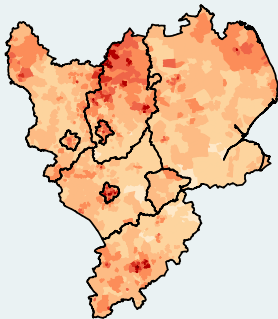

2015

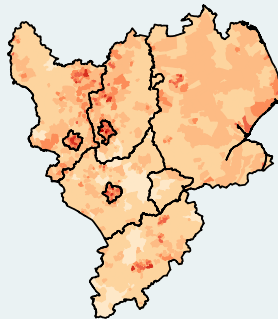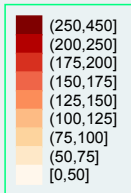

# East of England, acute morbidity

2004

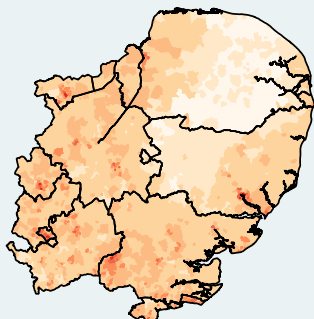

2007

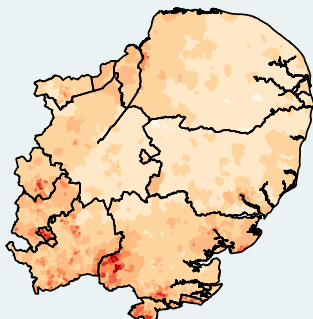

2010

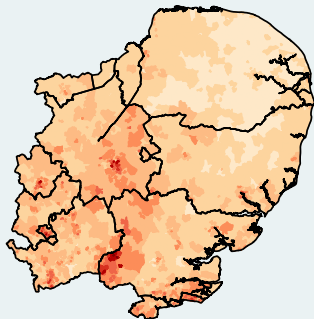

2015

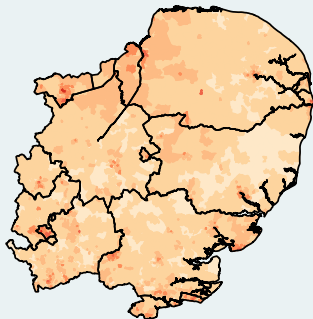

# North East, acute morbidity

2004

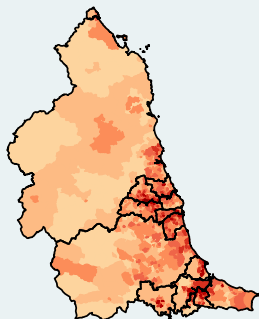

2007

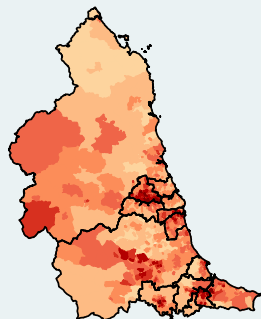

2010

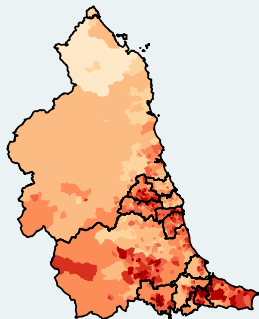

2015

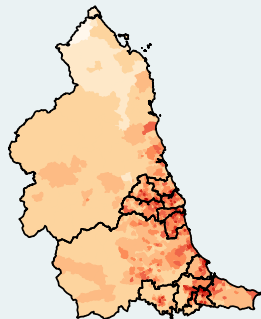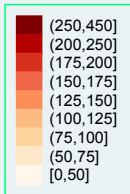

# North West, acute morbidity

2004

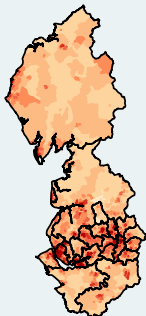

2007

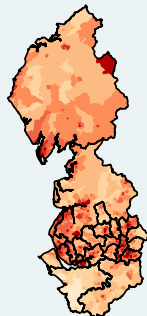

2010

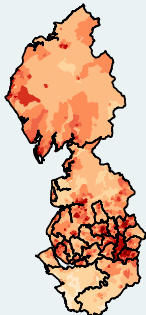

2015

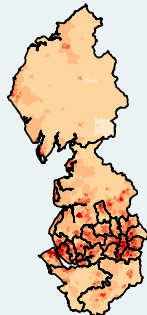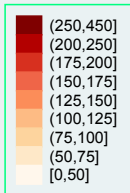



# South Central, acute morbidity

2004

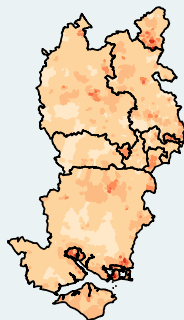

2007

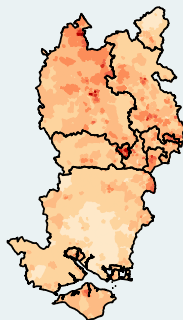

2010

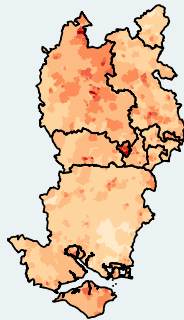

2015

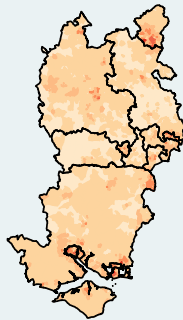

# South East Coast, acute morbidity

2004

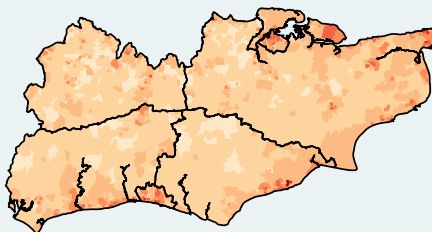

2007

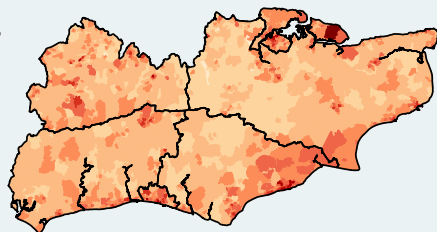

2010

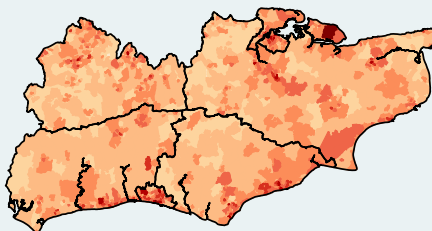

2015

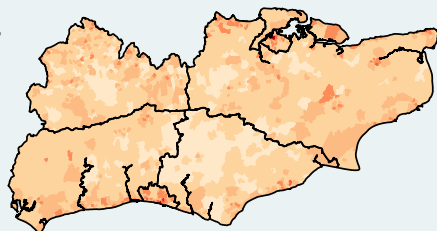

# South West, acute morbidity

2004

2007

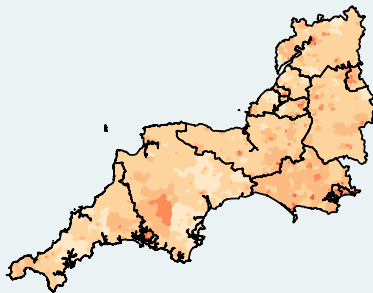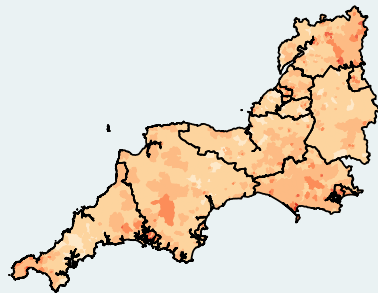

2010

2015

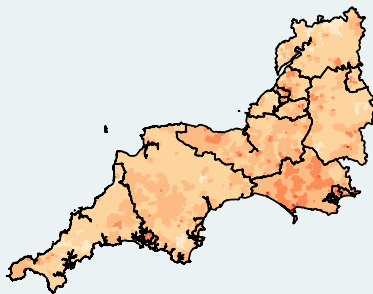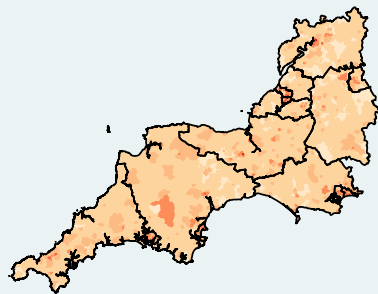

# West Midlands, acute morbidity

2004

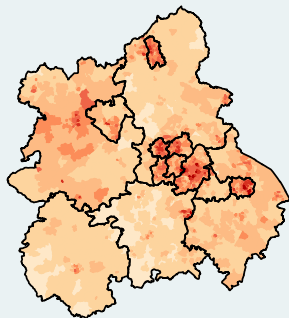

2007

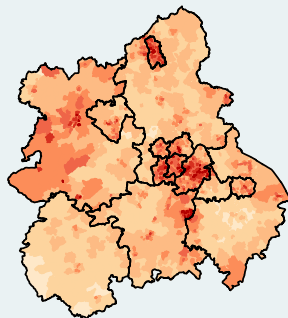

2010

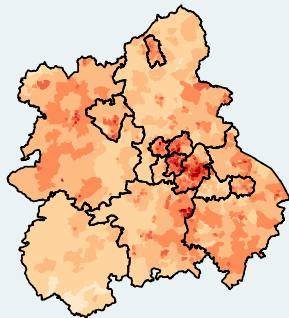

2015

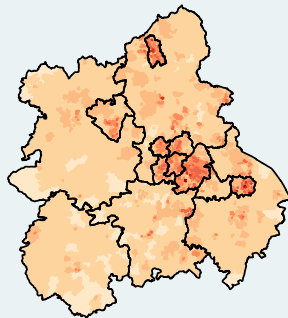

# Yorkshire and the Humber, acute morbidity

2004

2007

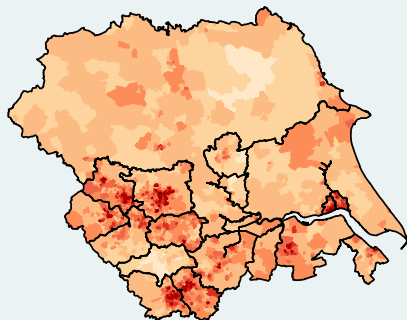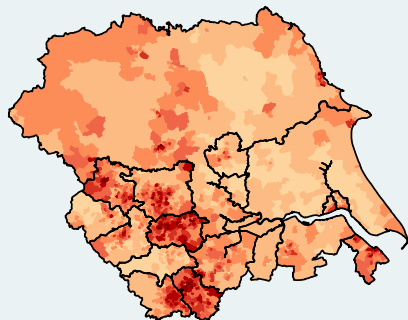

2010

2015

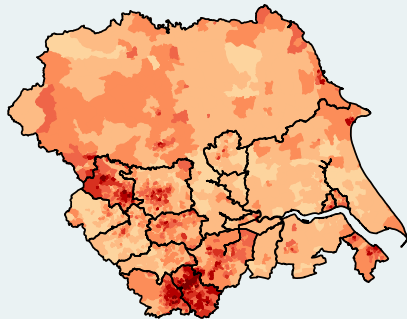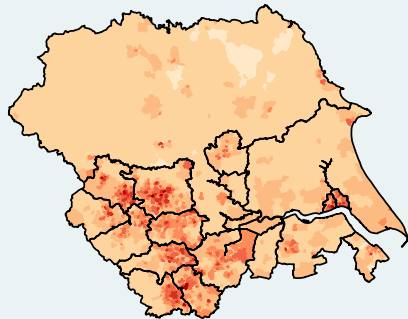

Supplement: inline-supplementary-material-6 [file inline-supplementary-material-6.pdf]
